# Supplementary material
Source: Springer Nature journal article supplement (https://www.springermedizin.de/resource/supplementary/12936_2007_389_MOESM2_ESM.pdf/9547700)
Supplement: MOESM2 [file 9547700]

# A

```

      10      20      30      40      50      60      70      80      90      100
Pyn_ch1091  ....|....|....|....|....|....|....|....|....|....|....|....|....|....|....|....|
Pb_PB107300.00.0  NKILRNWLLLYIKFVCKMTANSK-IINLSIFFSINAFYMLLYLFNHTFIQVISTLCILLLLVSGLFVFLQVNTVSGYKENEKLEIVSKKALEGFTITLYE
Pk_PK13_6530w  -----P-----D-----S-----
Pv_v115155  -----NM..N.V...A...L.I....Q..L..C.....L..L...HK..E...D.....EMI..SCVM..I..
-----NL..N.V.M..A...L.I....Q..L..C.....L..L...HK..D..SD.....ETI..SC.M.I..

      110      120      130      140      150      160      170      180      190
Pyn_ch1091  ....|....|....|....|....|....|....|....|....|....|....|....|....|....|....|....|
Pb_PB107300.00.0  LITDKLTLVRKYLLWKNMENLTVIVVIYLIGNFFSFVNFSVLFYIITWGIFLYLNHISNVYIKKIYAVAHPCYVDLKBQMKVYVENIPKPKLKHKKNI
Pk_PK13_6530w  I.N.....I.....
Pv_v115155  ..N...IA.....T.R...V..ILI.F.SV..L..I.....A.....N...T..CKLV..Y....DHA..MFD.....T.
..N.....N.R...V...I...SV..L.....MV..A.....N...T..CEL...Y....RD.A..MFD.....T.

```

# B

```

      1010      1020      1030      1040      1050      1060      1070      1080      1090      1100
Pyn_ch1055_ORF1  ....|....|....|....|....|....|....|....|....|....|....|....|....|....|....|....|
Py_PY01982  -SLEAAKAAEEKVEAAEKVEAVEK-----VEAAEKVE-----AAEKVEAAEKVEVAEKVEVAEKVE-----
Pb_PB000698.02.0  HDN.QDD.DSK.S.ENDESNSN.NGKNGKNGKNEMLN.TKSEINEVALNKT--ETA.CDDK..K.HKETS LNKN.KNIPSLKDLKKEKDKNLIKTD
YDT.KVD.DSK.I.ENDPESNSN.NVKN-----CE..TKSEINEMVLNKTLET..CDDQQ..KITHKEICLKNKKNIPSLKDLKKEKDKNLIKTD

      1110      1120      1130      1140      1150      1160      1170      1180      1190      1200
Pyn_ch1055_ORF1  ....|....|....|....|....|....|....|....|....|....|....|....|....|....|....|....|
Py_PY01982  -----AAEKVEEKVEEKVEENKDEEN-----
Pb_PB000698.02.0  N--NINERKFIEK.VK.NI..ML..E.IE...SEKIWDPTDLSLFTSETISKIMNLKLFSSVQENINDNIEKSFALNSSEKTAVANAEEEEKEEEK
NNINNINERKFIEK.VK.NI..ML..E.IE...SGKITLDPDLSLFNRSETISKIMNLKLFSSVQENNKSETVKNQQNN-----CNPLNQENRNDAI

      1210      1220      1230      1240      1250      1260      1270      1280      1290      1300
Pyn_ch1055_ORF1  ....|....|....|....|....|....|....|....|....|....|....|....|....|....|....|....|
Py_PY01982  -----KDEEN-----KAEEN-----
Pb_PB000698.02.0  KEEKDEKDEEKDEKKDEKKDEKKDEEKEEKEKESGEPHLDKTANTSS.NQ.QSTSKIVSKIGISKKFAPKFPPLKASKHCVSKGSVEAAK...KVEAV
KRSFTFKSIEKMSIANSEK-----EKETREPHIDKANTSSN.Q.QNTSKVP SKIVISKKLTSKFSLKSNKNCIFKGNVEAVE.V.K.VEEI

      1310      1320      1330      1340      1350      1360      1370      1380      1390      1400
Pyn_ch1055_ORF1  ....|....|....|....|....|....|....|....|....|....|....|....|....|....|....|....|
Py_PY01982  -----KAEENKAEENKEDNFVTKPNILKHPLKAKMETPSLPKNNVEKALIKK-----
Pb_PB000698.02.0  EKVEAAEKVEAVEKVEAAEKVEAAE.V...D.....D.....PG--I.....NNFIKLNINIKNVLPSELPIKNVKI
EQVEK--KVEAVEKIE-----E.N.T.Y..H..K...C...S...DH...AC--S.R.....NNFIKLNITIKNILPLKELPIKNGNN

```

# C

```

      10      20      30      40      50      60      70      80      90      100
Pyn_ch1055_ORF2  ....|....|....|....|....|....|....|....|....|....|....|....|....|....|....|....|
PC_PC406006.00.0  -----FFFIRAFSTLFLGRLGILAFKGCFSIPGFLVTKLSFSFFSSALFSSALFSSALFSSSLFSSSLFSSSTFSSTFSSTFSAASTFSATSTF
MFFKFLSFLMKL.....T.....P.....M...AA...G-----

      110      120      130      140
Pyn_ch1055_ORF2  ....|....|....|....|....|....|....|....|....|....|....|....|....|....|....|....|
PC_PC406006.00.0  SATSTFSAASTFSAASTFSAASTFSTASTFSAASTFSSAFFAASKL
-----

```
